# Supplementary material
Source: Springer Nature journal article supplement (https://www.springermedizin.de/resource/supplementary/12889_2010_2504_MOESM2_ESM.pdf/9486186)

**A**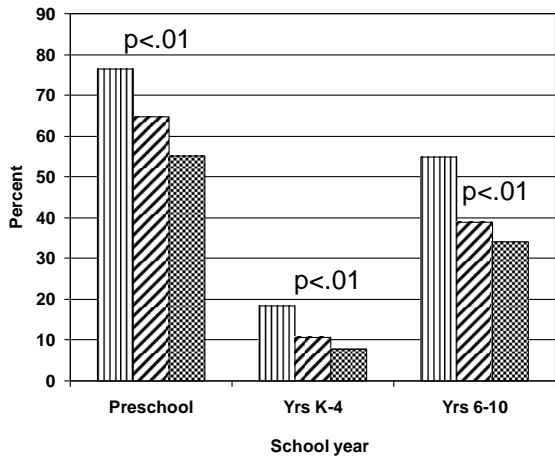**B**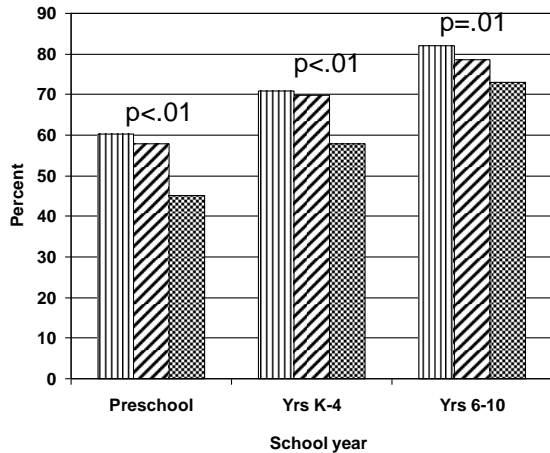

Supplement: MOESM2 [file 9486186]
